# Supplementary material
Source: MDPI journal article supplement (https://www.mdpi.com/1424-8247/17/2/224)

Fig 2E-F

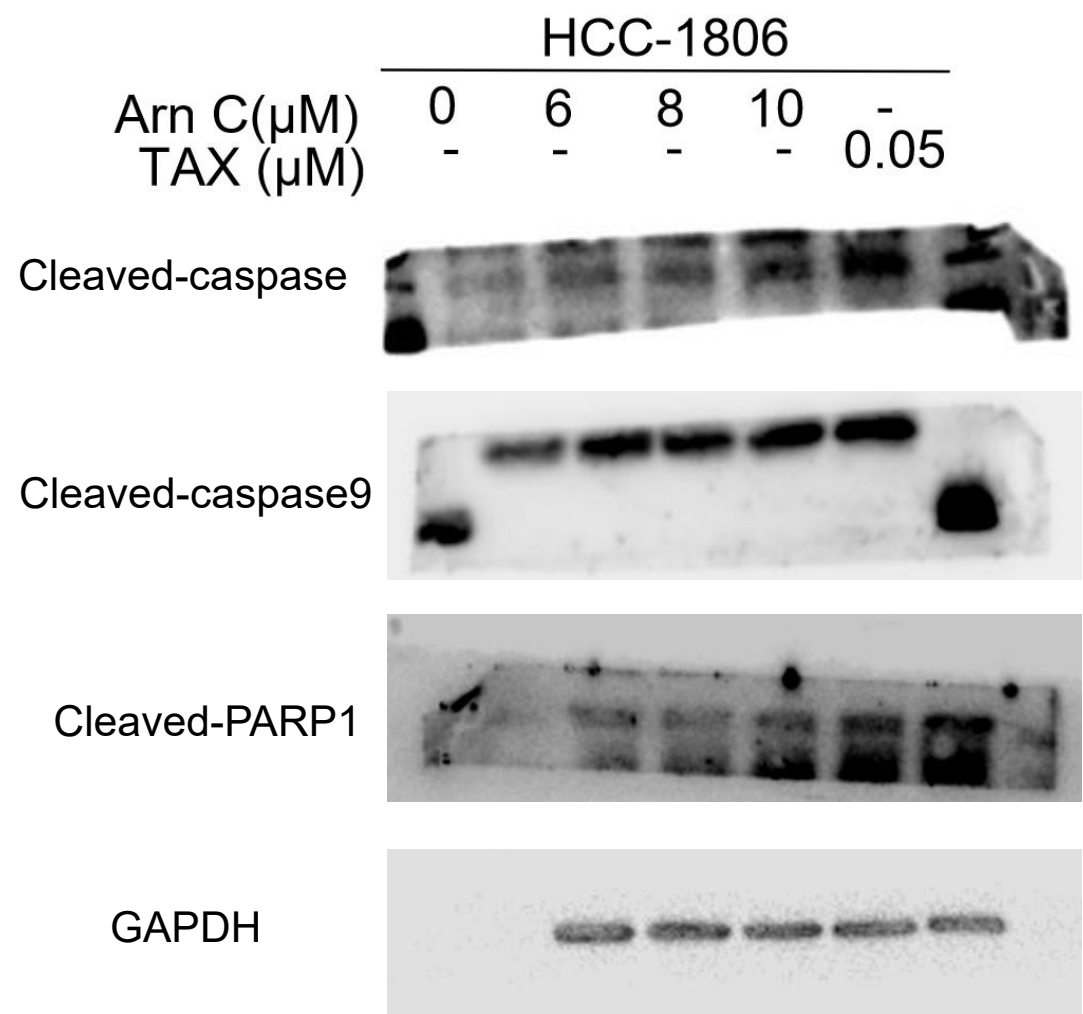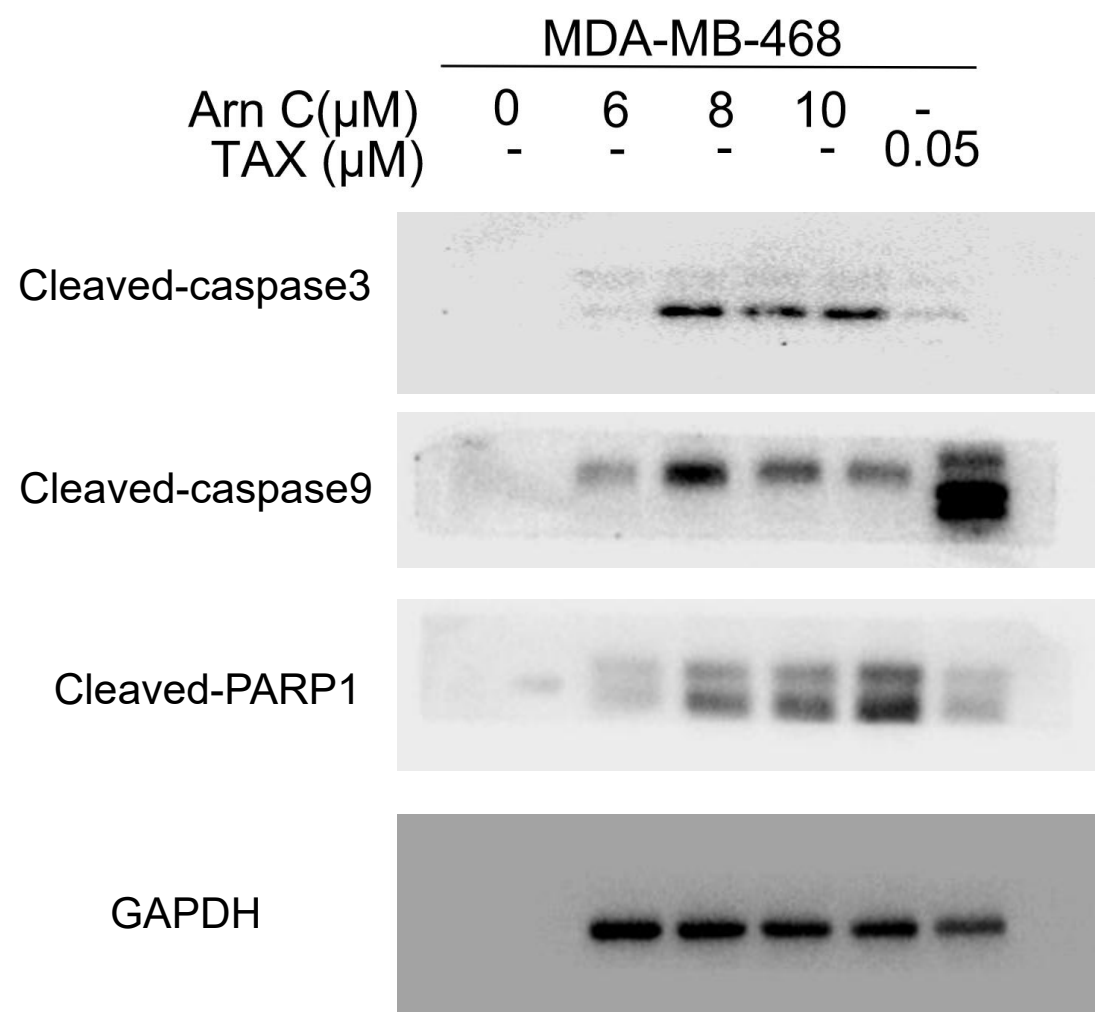

**Fig 3C**

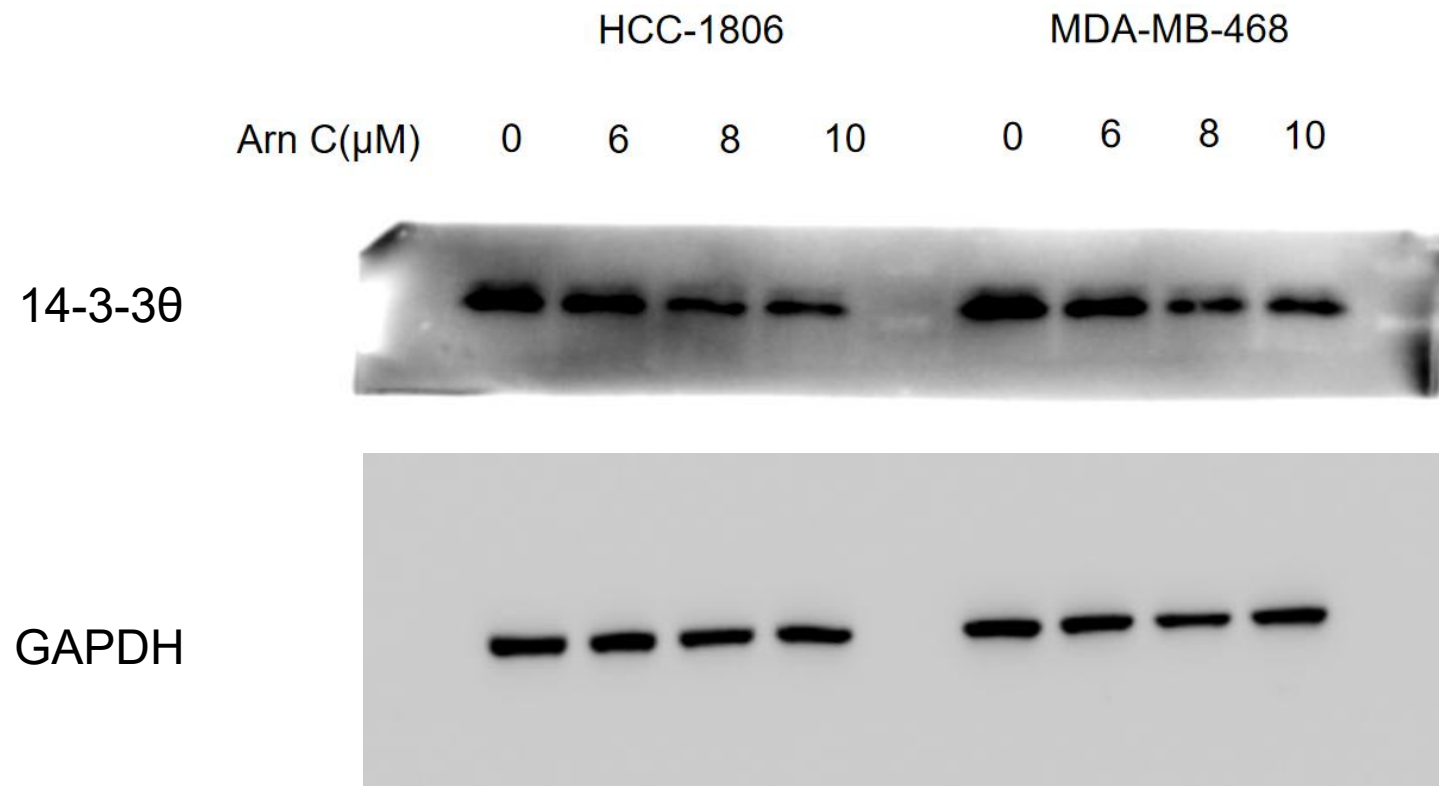

Fig 4A

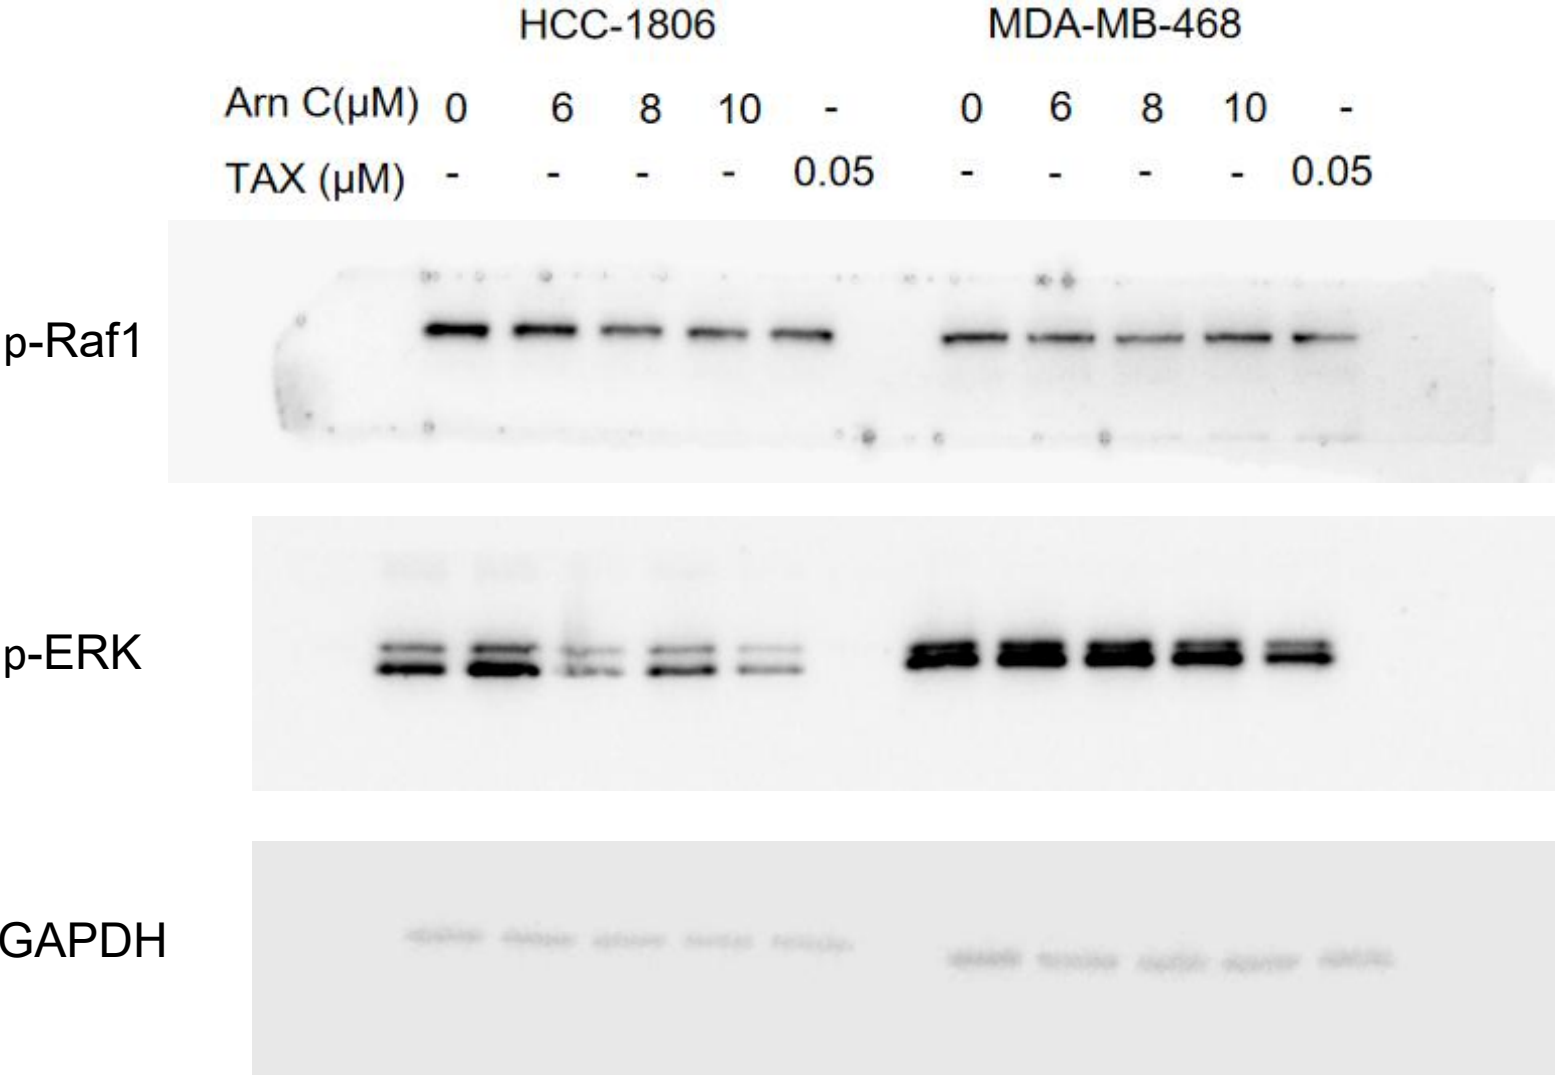

Fig 4B

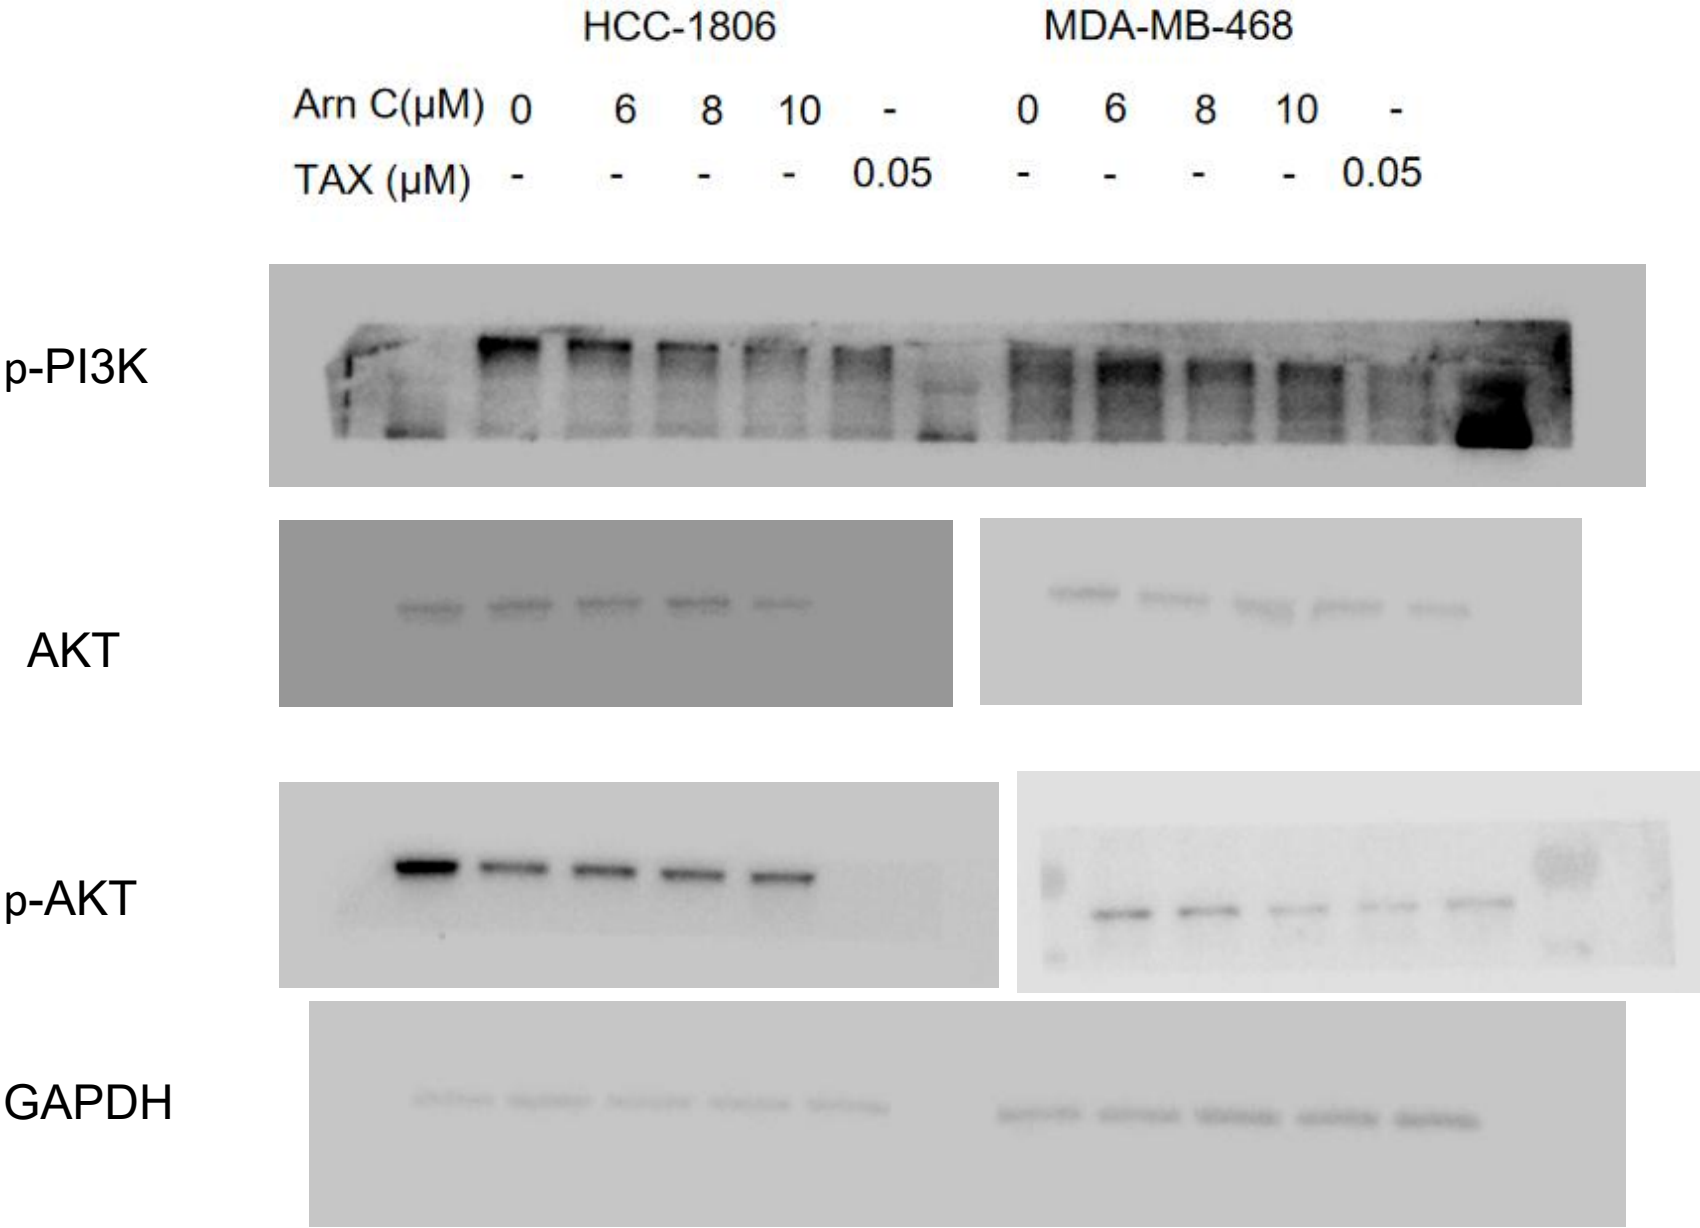

Fig 4C

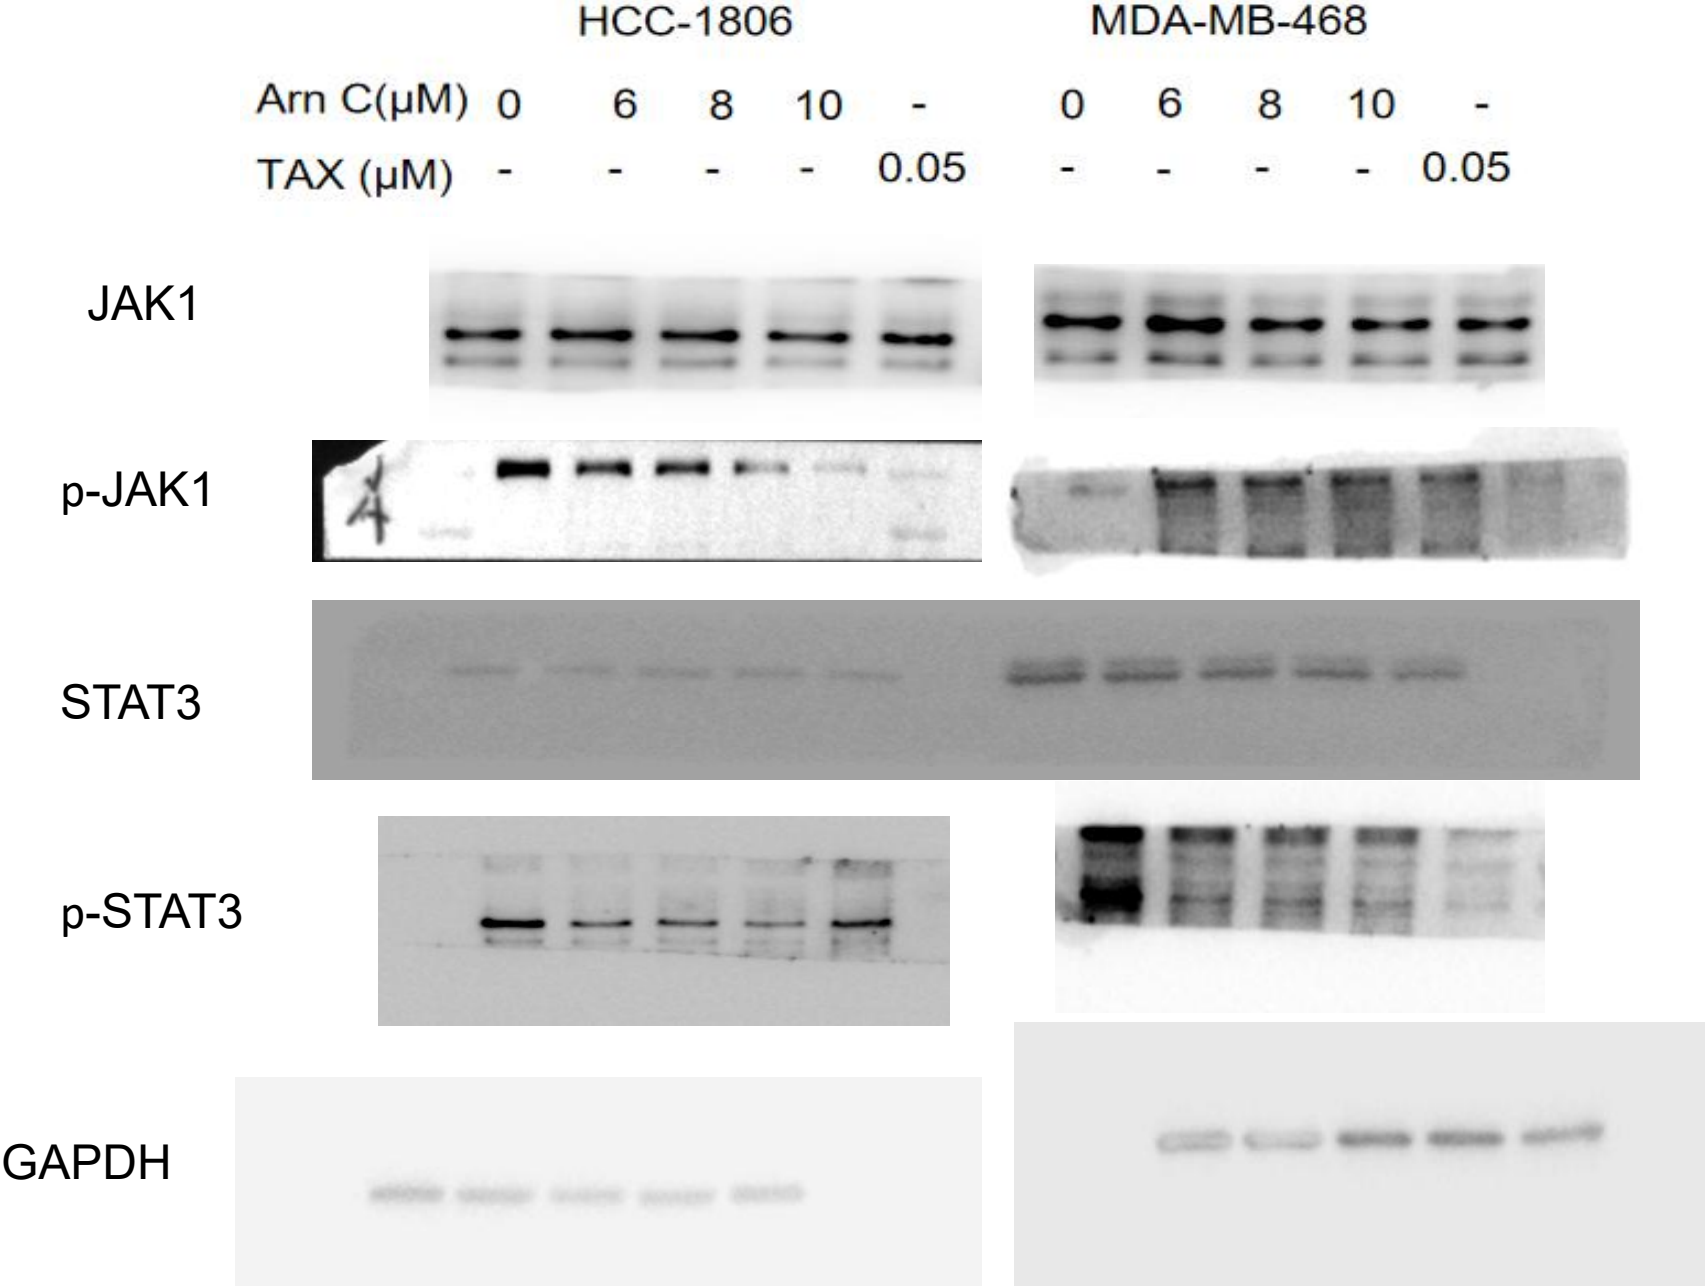

Fig 6F

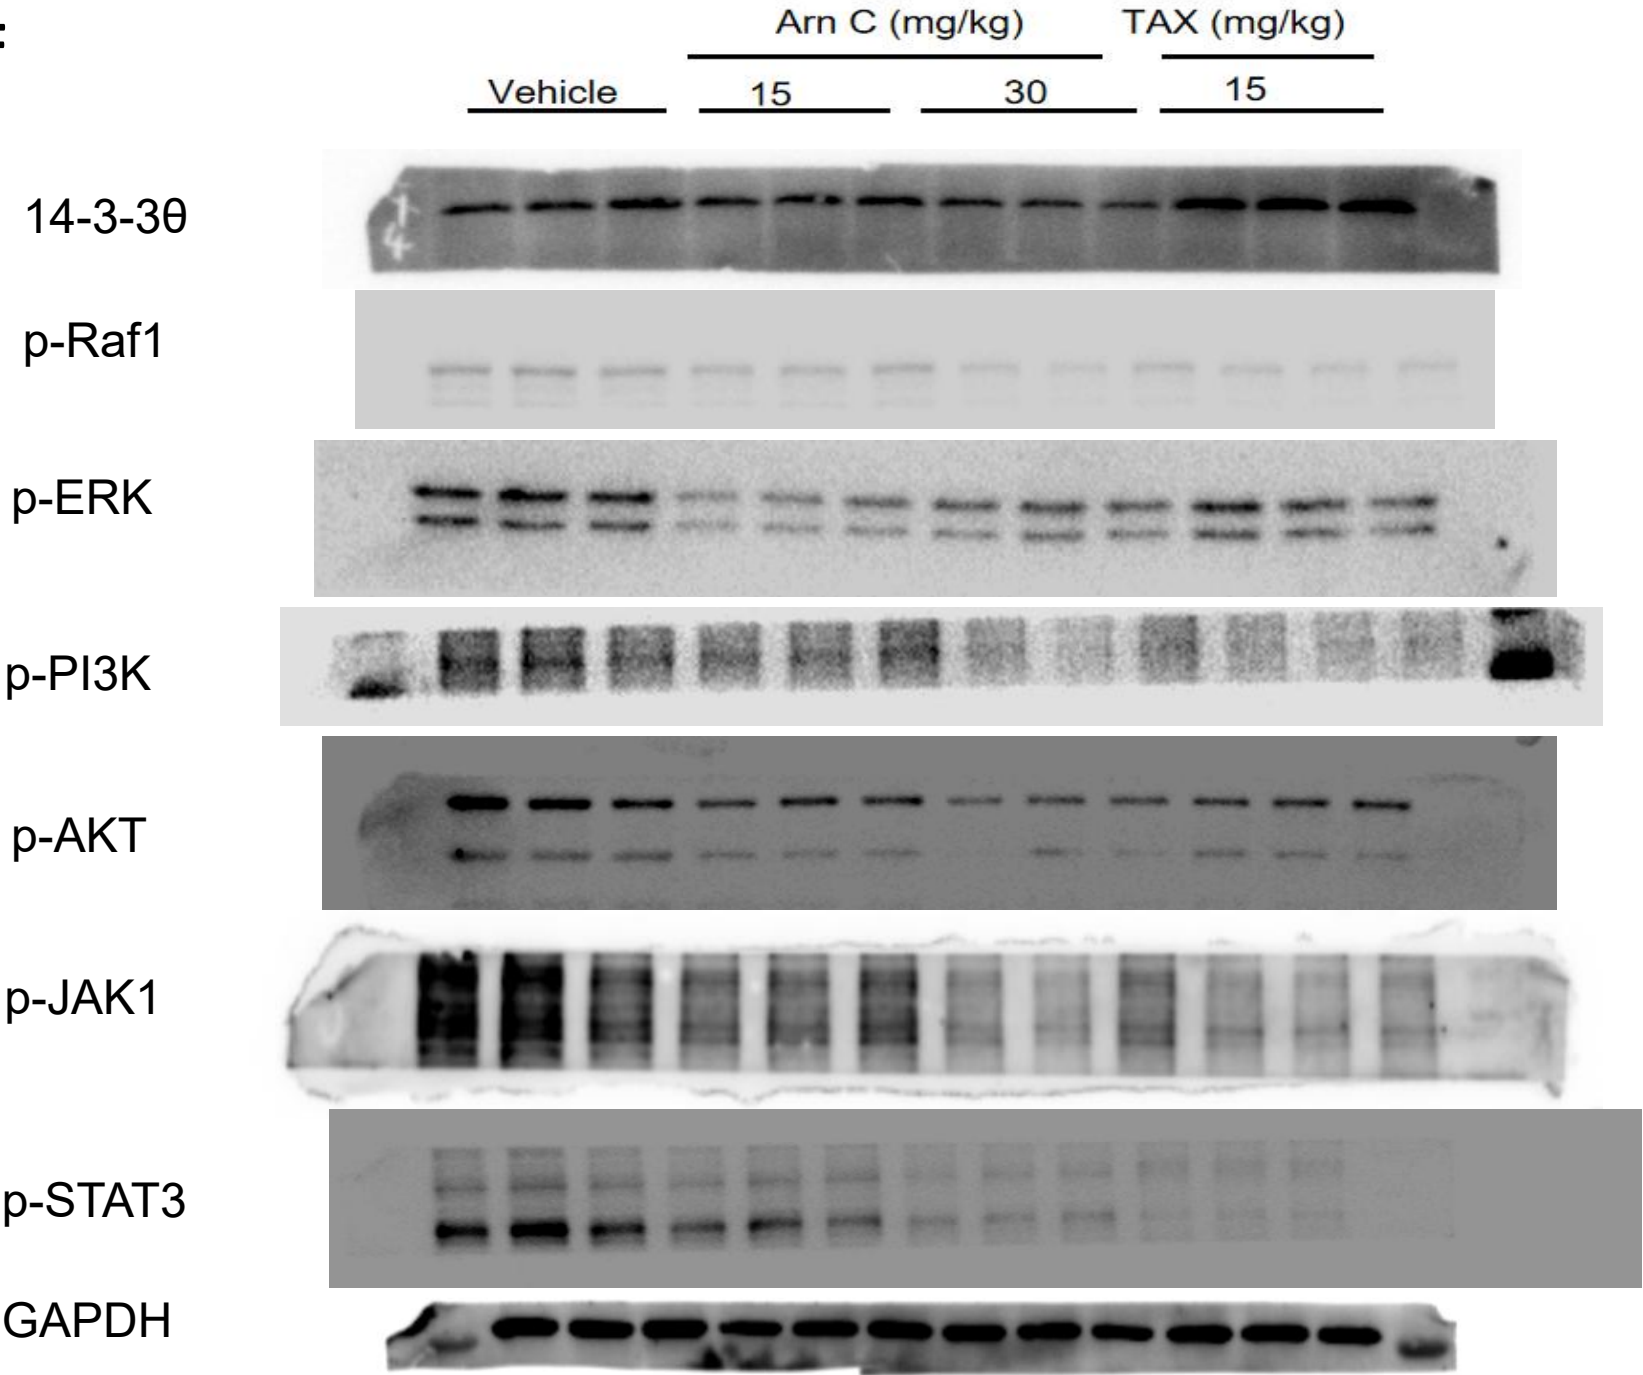

Supplement: s1 [file s1]
